# Supplementary material for: Conducting Polymer-Infused Electrospun Fibre Mat Modified by POEGMA Brushes as Antifouling Biointerface
Source: MDPI journal article supplement (doi:10.3390/bios12121143), 2022-12-07
Supplement: s1 [file s1]

## Supporting Information

# Conducting Polymer Infused Electrospun Fibre Mat Modified by POEGMA Brushes as Antifouling Biointerface

*Jesna Ashraf, Sandy Lau, Alireza Akbarinejad, Clive W. Evans, David E. Williams, David Barker, Jadranka Travas-Sejdic\**

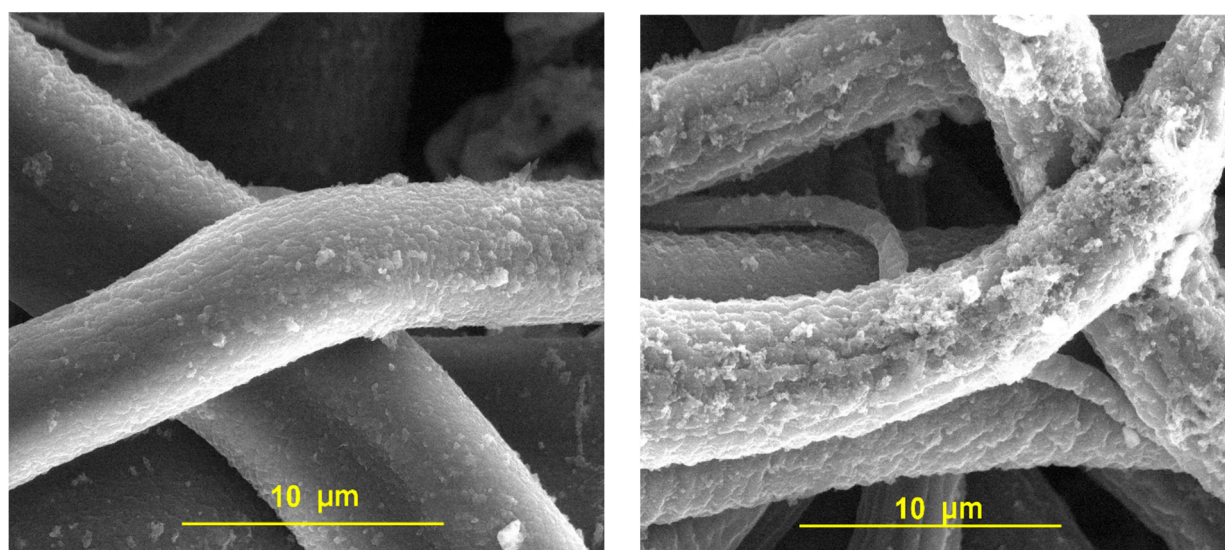

**Figure S1.** SEM images of sSEBS-PEDOT (left) and sSEBS-PEDOT/P(EDOT-co-EDOTBr) (right).

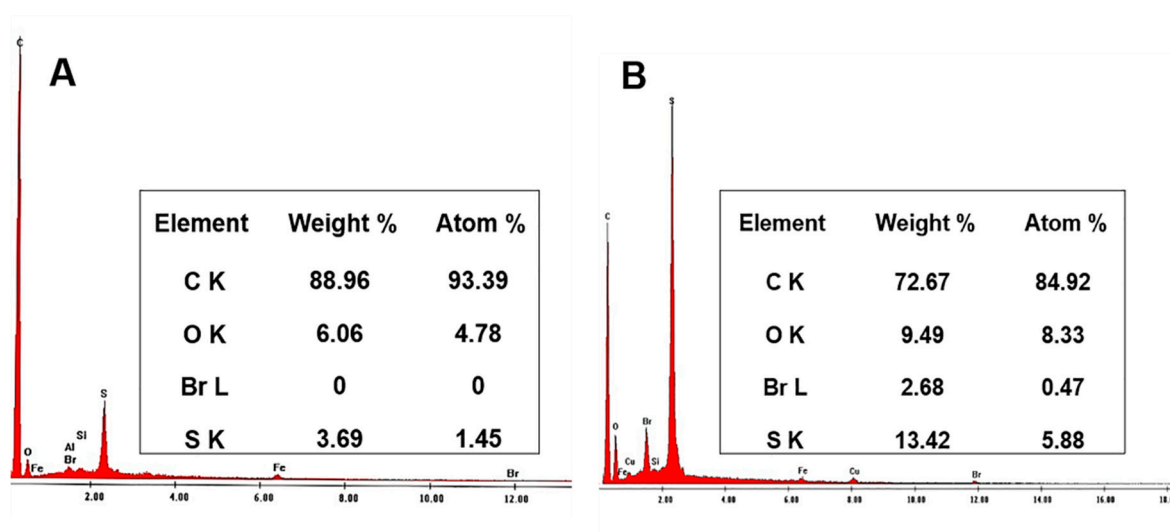

**Figure S2.** SEM-EDS analysis of bromine in A) SSEBS-PEDOT fibre mat and B) electropolymerized fibre mat bearing the brominated macroinitiator [SSEBS-PEDOT-P (EDOT-co-EDOTBr)].

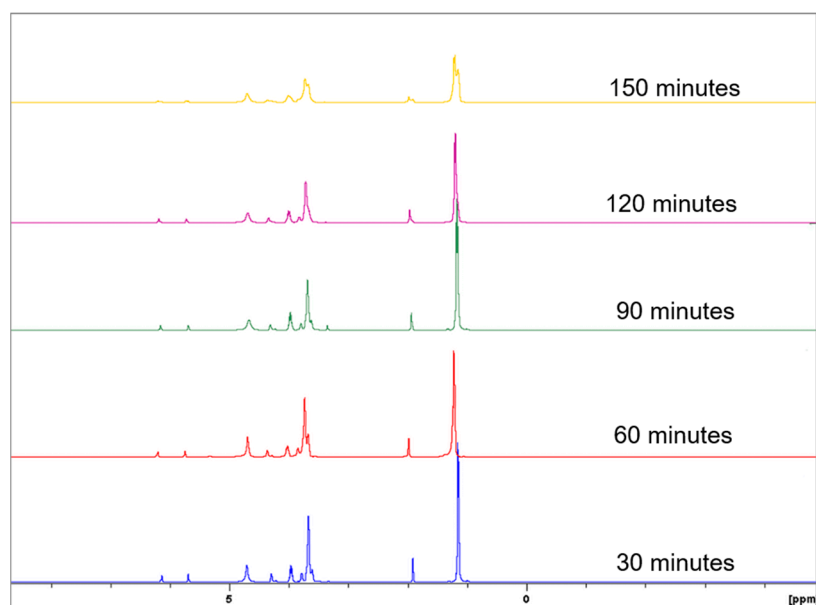

**Figure S3.** NMR spectra of OEGMA monomer from the ATRP reaction solution at different time intervals.

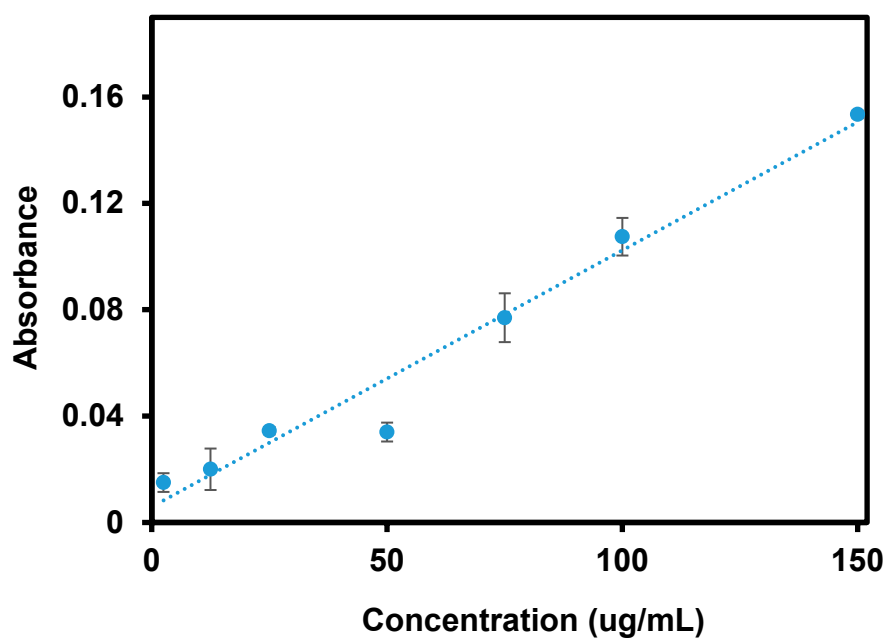

**Figure S4.** Calibration curve of BSA standards at different concentration vs absorbance measured using BCA protein assay.

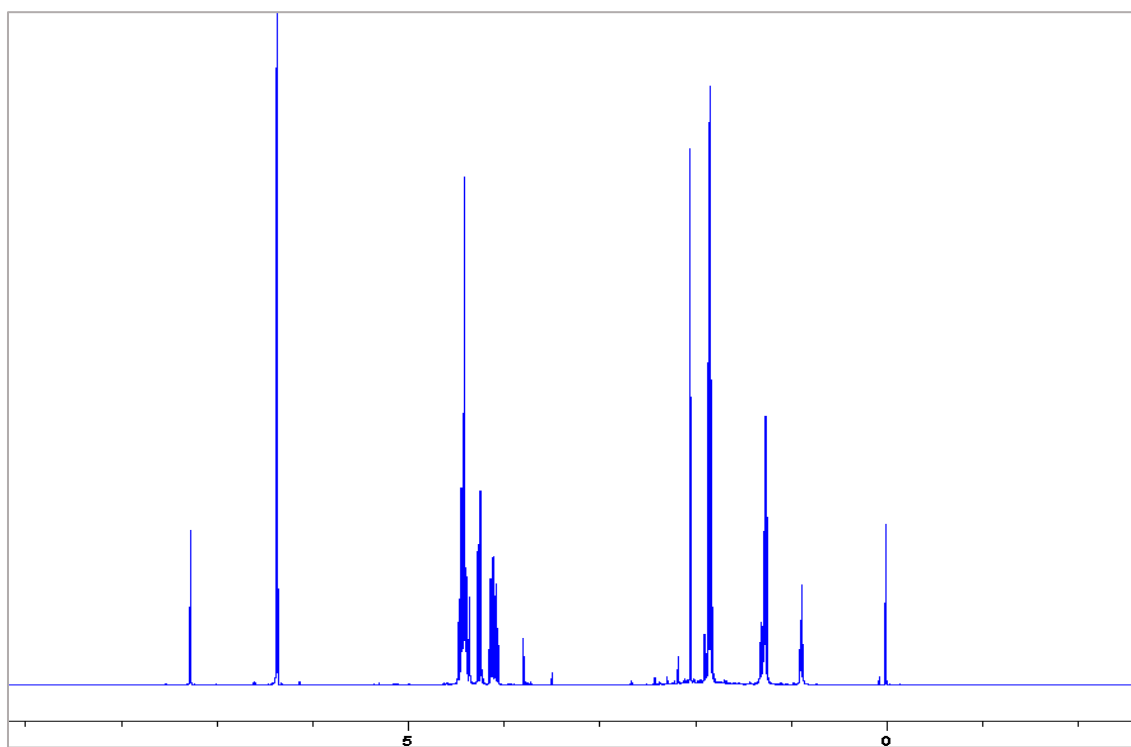

**Figure S5.** <sup>1</sup>H NMR spectrum of synthesized EDOTBr.

**Table S1.** Examples of antifouling modifications on different electrode surfaces.

| Material                  | Modification                                                                             | Results                                                                                    | Reference |
|---------------------------|------------------------------------------------------------------------------------------|--------------------------------------------------------------------------------------------|-----------|
| Polymeric microsphere     | Poly(sodium 4-styrenesulfonate) (PNaSS) crosslinked PEDOT microstructure - smart surface | The attached bacterial wall was destroyed by the application of constant potential >0.5 V. | [1]       |
| Glassy carbon electrode   | PEDOT/Hyaluronic acid (HA) electrodeposited on GCE                                       | Changes in CV peak currents were very small due to excellent fouling resistance.           | [2]       |
| Glassy carbon electrode   | PEDOT: PSS modification                                                                  | Reduced fouling allows continuous monitoring of tricresyl phosphate.                       | [3]       |
| Stainless steel substrate | PEDOT/Graphene oxide and PEDOT/PSS nanohybrid coating                                    | PEDOT/GO and PEDOT/PSS showed excellent antifouling efficiency.                            | [4]       |
| Glassy carbon electrode   | PEDOT/Ionic liquid electrodeposited glassy carbon electrode surface                      | Ability to resist biofouling in complex human serum.                                       | [5]       |
| Electrospun fibre mat     | sSEBS-PEDOT/P(EDOT-co-EDOTBr)-g-POEGMA brush grafted surface                             | >80 % antifouling efficiency                                                               | This work |

**References:**

- [1] Tomšík, E., Laishevskina, S., Svoboda, J., Gunar, K., Hromádková, J., and Shevchenko, N. (2022) Preparation of Smart Surfaces Based on PNaSS@ PEDOT Microspheres: Testing of E. coli Detection, *Sensors* 22, 2784.
- [2] Wang, W., Cui, M., Song, Z., and Luo, X. (2016) An antifouling electrochemical immunosensor for carcinoembryonic antigen based on hyaluronic acid doped conducting polymer PEDOT, *RSC advances* 6, 88411-88416.
- [3] Yang, X., Kirsch, J., Olsen, E. V., Fergus, J. W., and Simonian, A. L. (2013) Anti-fouling PEDOT: PSS modification on glassy carbon electrodes for continuous monitoring of tricresyl phosphate, *Sensors and Actuators B: Chemical* 177, 659-667.
- [4] Hsu, C.-C., Cheng, Y.-W., Liu, C.-C., Peng, X.-Y., Yung, M.-C., and Liu, T.-Y. (2020) Anti-bacterial and anti-fouling capabilities of poly (3, 4-Ethylenedioxythiophene) derivative nanohybrid coatings on SUS316L stainless steel by electrochemical polymerization, *Polymers* 12, 1467.
- [5] Song, Z., Sheng, G., Cui, Y., Li, M., Song, Z., Ding, C., and Luo, X. (2019) Low fouling electrochemical sensing in complex biological media by using the ionic liquid-doped conducting polymer PEDOT: application to voltammetric determination of dopamine, *Microchimica Acta* 186, 1-9.
